# Supplementary material for: Dysfunctional dorsal raphe dopaminergic neurons and locus coeruleus noradrenergicneurons cause anxiety and depression in a Parkinson’s disease mouse model
Source: Research Square preprint supplement (doi:10.21203/rs.3.rs-3407836/v1), 2023-10-13
Supplement: Supplementary file 1 [file c1243ecc9ba22bcab8c4edf1.docx]

**STAR Methods**

***Animals***

The study was carried out in haSyn1-120 mice as a model of Parkinson’s disease at different time points: 3, 8, and 18 months. The haSyn1-120 model is based on the progressive accumulation of truncated human aSyn in the C-terminal (1-120aa) specifically in TH+ neurons (dopaminergic and norepinephrinergic neurons) using the rat TH promoter (Tofaris et al., 2006, Garcia-Reitböck et al., 2010). As differences between males and females were not detected, the data from both sexes were pooled. haSyn1-120 mice were bred, genotyped, and housed in the Cajal Institute facilities, and age- and sex-paired C57BL6JOla mice that lack murine aSyn were used as controls. Animals were housed in groups of 4-5 and maintained on a 12 h light/dark cycle with ad libitum access to food and water. All animal procedures were approved by the CISC Ethical Committee and performed following the European Union Guidelines (Directive 2010/63/EU).

***6-Hydroxydopamine lesions***

6-OHDA injections in the dorsal raphe nucleus (DRN) or in the locus coeruleus (LC) of 2-3-month-old haSyn1-120 mice were performed in isoflurane-anesthetized animals with a stereotaxic apparatus (David Kopf® Instruments, Tujunga, California, USA).  6-OHDA-HBr (Sigma, Madrid, Spain) was dissolved at 4 μg/μl in saline with 0.2% ascorbic acid and injected with a Hamilton needle (Harvard Apparatus, Massachusetts, USA) coupled to an infusion pump at 100 nl/min.

For the DRN, a total of four deposits, 500 nl each, were infused, two at a 20º angle from the medial plane (one per hemisphere), at the following coordinates from bregma and *dura mater:* AP= -4.5; ML= ±1; DV= -2.8 y DV= -2.6*.* The other two deposits with a 30º angle from the posterior plane (rostral to caudal direction), at the coordinates: AP= -5.5; ML= 0; DV= -2.8; DV= -2.6*.* As LCNE projects to the DRN, aiming to ensure noradrenaline system integrity, animals received desipramine (20 mg/kg, i.p.; Sigma-Aldrich, Spain) 30 min before 6-OHDA injections.

For the LC, one deposit of 500 nl was infused at 125 nl/min at the following coordinates: AP= -5.4; ML= ±0.9; DV= -2.5 and DV= -2.3. In this group, desipramine was not injected, to ensure norepinephrine lesion. Behavioral testing was performed 2-3 weeks after the lesions.

***Chemogenetic activation of DRNDA neurons***

To selectively express Cre recombinase protein in DRNDA neurons, we used the viral construct AAV9-Thp-Cre at 2.2 x 1013 viral infective units/ml (provided by Dr. Karl Deisseroth, Stanford University, US). For chemogenetic activation of DRNDA neurons, we selectively expressed the activating DREADD (hM3DGq) using the viral construct AAV9-hSyn-DIO-hM3DGq-mCherry at 2.4x1013 viral infective units/ml (provided by Dr. Alcudia, Gene Vector and Virus Core, Stanford University, US).  Both sets of viral particles were injected at the same time in the DRN of symptomatic 6-7-month-old haSyn1-120 mice with a 20º angle from the medial plane at the following coordinates: AP= -4.6; ML= +1.15; DV= -3.2 at 50 nl/min with a total volume of 400 nl. After 4 weeks, mice were injected intraperitoneally with clozapine N-oxide (CNO, 3 mg/kg dissolved in 0.9% saline) 30 min before behavioral testing. Animals were sacrificed after the behavior to assess hM3DGq-mCherry expression in TH neurons by double immunofluorescence using TH and mCherry antibodies, followed by co-localization studies (see Immunofluorescence subheading).

***Dopamine release in behaving animals: fiber photometry experiments***

To measure *in vivo* dopamine release in the extended amygdala, we carried out fiber photometry experiments in the bed nucleus of stria terminalis (BNST) and in the central amygdala (CeA), the main target areas of DRNDA neurons (Dougalis et al., 2012, Zhou et al., 2022). We measured dopamine release in the BSNT during the sucrose consumption test, which evaluates depression, and in the CeA during mice uplifting as an anxiogenic stimulus (Owens-French et al., 2022). Both behaviors have been shown to increase dopamine release in these specific areas (Park et al., 2012; Lin et al., 2020, Owens-French et al., 2022).

To express the dopamine sensor dLight1.1, AAV9-hSyn-dLight 1.1 viral particles were injected in the BNST (AP= +0.18; ML= -0.88; DV= -4.1) or in the CeA (AP= -0.8; ML= +2.9; DV= -4.5) of control and symptomatic haSyn1-120 mice at 8 months old, at a 50 nl/min flux for a total volume of 200 nl in each region using a Hamilton syringe (701RN 10µl SYR, 26S/2”/2), with a Nanomite Harvard Apparatus pump (model: 11 Elite). The fiber optic cannulas (RWD, 200 μm core, 5 mm length) were implanted at the same coordinates as the viral injections, 3 weeks later. Cannulas were fixed to the mouse skull with adhesive cement (C&B Metabond; Parkell) followed by dental cement (Ortho-Jet; Lang). A thin metal headbar of 20 x 3 mm was also mounted to the skull to help manipulate the animals when fiber optic patch-cords were connected to the cannulas for behavioral testing.

We used a photometry system (FP3002, Neurophotometrics, San Diego, CA, USA) controlled via Bonsai software (Lopes et al., 2015). A single-branch mono-fiber optic patch-cord (length= 3 m, 200 µm core, NA= 0.37) from Doric Lenses (Quebec, Canada), was coupled to the system and connected to optical fibers placed on each brain region (BNST, CeA) of the mouse. This single fiber was LED-excited with two distinct wavelengths: 470 nm for signal detection and 415 nm for autofluorescence isosbestic correction. Light intensity at the tip of the fiber ranged from 60-70 µW, tested before behavioral trials, and was constant across trials over testing days. Signals were collected at a sampling frequency of 60 Hz, alternating between 470 and 415 nm excitation. The recorded data were analyzed with MATLAB (2020b) custom scripts. The 415 nm isosbestic data was re-aligned to the 470 nm via a linear robust-fit algorithm from MATLAB. Then, the re-aligned 415 nm signal was z-scored and subtracted from the z-scored 470 nm signal (Martianova et al., 2019). Incremental changes in fluorescence were measured by computing the ratio between the average signal intensity during the 4 s prior to the onset of the behavioral task and the fluctuations of the signal during a task or the interaction between the animal and a specific element of the task (∆F/F 0). We digitally recorded time-stamps of elements of the task by the experimenter pressing a button. To maximize the description of the behavior and time resolution, we recorded animal behavior with multiple video cameras synchronized with the frames of the fiber photometry recordings, to identify specific moments in the videos with imaging signal recordings, with an accuracy of a single frame (~33 ms). The alignment of the imaging signal at different behavioral events was chosen to quantify imaging signals during abnormal behavior between animal groups. Imaging signals were analyzed by combining several behavioral events from experimental sessions from different animals. To avoid biases from animals with a larger signal, the contribution of each animal was normalized by the registration of imaging signal during isoflurane anesthesia. This allowed compensation for the diversity of signal intensity due to physical aspects such as the location of the fiber cannula relative to the viral expression region in the tissue or the expression level itself.

***Behavioral testing***

All tests were performed between 9 am and 2 pm, after 30 min of habitation to the test room.

***Anxiety-like behavior***

*Open field test (OF)*. Mice were placed in one of the corners of a 50 cm (length) x 50 cm (width) x 38 cm (height) dark plastic cage and allowed to explore freely for 5 min. The distance moved (cm) and the time (s) spent in the center and in the corners of the cage were analyzed using Ethovision XT Software (Noldus) (Espadas et al., 2021).

*Elevated plus maze (EPM).* This maze stands 50 cm above the floor and has two open (unprotected) arms and two closed (protected) arms, each measuring 35 cm (length) x 5 cm (width). Closed arms were surrounded by 15 cm (height) walls. Arms were made of dark Plexiglass and positioned at 5 cm (length) x 5 cm (width) within the central platform. To assess anxiety-like behavior, mice were placed in the central platform, facing one of the open arms, and were allowed to freely explore the maze for 5 min. As in Espadas et al. (2021), we recorded the number of entries and the time spent (s) in the open arms using Ethovision XT software (Noldus).

*Novelty suppressed feeding test (NSFT)*. After 24 h of food deprivation, mice were placed in the corner of a 40 cm (length) x 40 cm (width) x 30 cm (height) light plastic cage full of sawdust with a regular pellet placed in the center of the cage, on a piece of white filter paper, under bright lighting conditions. Following Espadas et al. (2021), we videotaped behavior for 5 min and measured the latency to the first bite (s).

***Depressive-like behavior***

*Three-chamber sociability test*. Mice were habituated for 15 min to a 60 cm (length) x 40 cm (width) x 22 cm (height) dark plastic cage divided in three identical chambers of 20 cm (length). The central chamber was connected to the two lateral chambers, each furnished with an empty grid cage (Ugo Basile, Italy). After habituation, a social stimulus (an age- and sex-paired intruder mouse) was placed inside the grid cage in one of the lateral chambers (the “social chamber”). Then, following Rein et al. (2020), we videotaped and quantified the time that the tested mice spent in the social chamber over the total time spent in the rest of the environment to calculate a percentage.

*Sucrose preference test*. Individual mice were habituated to the presence of 2 bottles of water in their cages for 3 days, followed by 1 day with 2 bottles of 2% sucrose. Then, mice were exposed for 24 h to 1 bottle of water and 1 bottle of 2% sucrose. We calculated sucrose preference as a percentage of the sucrose consumed over the total intake (water + sucrose) in g by weighing the bottles before and after the test.

*Tail Suspension Test*. Mice were suspended by the tail 1 m above the floor and videotaped for 6 min. We measured the immobility time (s) in the last 4 min of the test.

***Motor abilities***

*Rotarod test*. We habituated the mice for 1 minute to the rotarod (Ugo Basile) without movement and for 1 more minute at a constant speed of 4 rpm following the method previously described (Suárez et al. 2020; Espadas et al., 2021). Then, we exposed the mice to progressive acceleration trials (4 to 40 rpm over 5 min) 4 times, 20 min apart. We quantified the time to fall and the number of falls in the last trial.

***Behavioral tests using fiber photometry.***

*Mice uplifting*. Mice were placed in a cage similar to the home cage with the fiber patch cord connected to the animal’s head-mounted cannula and allowed to move freely. After 3 min, mice were uplifted in a parabolic trajectory towards another cage in approximately 2-3 s. We considered the starting point of the experiment the moment the mice were uplifted. Photometry data was recorded during the entire run, up to 5-6 min of duration, to allow the photometry signal to stabilize at normal amplitude.

*Sucrose consumption test (SC).* Mice were placed in a cage similar to their home cage with the fiber optic patch-cords connected to the animal’s head-mounted cannula and allowed to move freely for 15 min. Then, a plastic container with 5% sucrose was introduced into the cage. Each time the mice contacted the solution was considered an event. Each event was scored manually and later contrasted with the videos. Fiber photometry data was recorded for approximately 4 min to secure 3 to 6 events; the average of events was used for the analysis.

***Simultaneous single-unit extracellular and oscillatory activity recordings of DRN in anesthetized mice in vivo***

Electrophysiology recordings were performed in DRN neurons in controls and in 3- and 8-month-old haSyn1-120 mice, anesthetized with urethane (i.p., 1.3 mg/kg, Sigma-Aldrich). The animals were then secured in a stereotaxic frame (David Kopf® Instruments, model 900) and placed on a heating blanket. Then, the skull was exposed, and craniotomies were performed to enable DRN recordings. In each mouse, an electrocorticogram (ECoG) of the sensorimotor cortex was performed (AP= 2.2 mm rostral to bregma, ML= 2.1 mm) with a 1 mm screw juxtaposed to the dura mater as described by Vegas-Suárez et al. (2021). During the recording session, saline was used to prevent dehydration, and the anesthesia level was frequently controlled by examination of ECoG and by testing the response of gentle sensory stimuli (tail pinch). Single-unit neuronal spikes and local field potential (LFP) recordings were performed using glass electrodes (TW150F-4, World Precision Instruments, UK) filled with a 2% solution of Pontamine Sky Blue in 0.5% sodium acetate. The electrode was lowered into the DRN (relative to bregma: AP= -4.5 mm, ML= -1.0 mm, DV= -2.5 to -4.0 mm) with a lateral angle of 20°C to avoid damaging the sagittal sinus, and DRN spikes were identified according to Llamosas (2015). Both signals were digitized using the CED micro1401 interface and Spike2 software (Cambridge Electronic Design). Then, these signals were pre-amplified (10×) and amplified (10×) in a high-input impedance amplifier (Cibertec S.A., model amplifier AE-2) and bandpass filtered (0.1–5000 Hz). In a second amplifier, the LFP signal was amplified (10×) and bandpass filtered (0.1–100 Hz) (Cibertec S.A., model amplifier 63AC). The ECoG signal was pre-amplified (10×), amplified (200×) and bandpass filtered (0.1–1000 Hz) in the same amplifier. The discriminated LFP and ECOG potential activity were digitized and further analyzed offline together with the simultaneous single-unit via MATLAB (2020b). To identify the location of the recorded unit, we performed juxtacellular labeling, passing a 5 μA cathodal current through the electrode, leaving potamine sky blue stain on the soma and dendrites of recording neurons, as previously described in Vegas-Suárez et al. (2021). Individual traces from each recording were processed to sort spikes from individual neurons within multi-unit recordings. Recordings were normalized by the standard deviation of the signal-taking windows of 0.5 s. Then, action potential peaks were detected when signal fluctuations exceeded the threshold of 2.65 standard deviations. Identified action potentials were clustered using the first 3 PCA components and using multi-Gaussian clusters fitting by iterating the number of clusters and computing the optimal differentiability using the Akaike information criterion. Incorrectly identified units corresponding to noise were discarded by examining the ISI and autocorrelogram histograms. Our algorithm was able to identify in an unsupervised manner ~242 neurons from ~191 recordings. Individual neuron spike times were utilized to compute the inter spike intervals (ISI). If ISI did not depart from an exponential distribution generated by a Poisson generative function with the same mean rate as the data, the neuron was classified as Poisson (see Fig. 6). The autocorrelogram for these neurons showed a refractory period of less than 10 ms, and a symmetric short-tailed distribution. Alternative neuronal firing type was defined as quasi-periodic when ISI has a clear peak and the autocorrelogram has a wide refractory period of several tens of ms and an oscillatory behavior for larger lags. Neurons that presented an individual peak at the ISI histogram in the window of the first 20 ms (Hayós et al. 2007) and an oscillatory behavior in the autocorrelogram were considered as bursty neurons. We also described for each neuron the coefficient of variation as CV = mean(FR)/std(FR) to describe how stationary the FRs were during the recording sessions.

***Sacrifice and tissue collection***

Mice were deeply anesthetized with sodium pentobarbital and transcardially perfused with cold 0.9% saline and 4% paraformaldehyde in 0.1 M sodium phosphate buffer. For histological and anatomical studies, brains were post-fixed overnight and cut into 30 μm-thick serial coronal sections on a vibratome (Leica).

***Immunohistochemistry***

Immunohistochemistry was done in free-floating brain sections using the standard avidin-biotin protocol, as previously described (Granado et al 2011; Espadas et al 2012). Antibodies are summarized in Table S1. For stereology, 1 of every 4 serial coronal sections containing the DRN or the LC was taken, using adjacent sections for TH, TPH2, and aSyn staining (DRN) and TH and aSyn (LC). The number of TH+, TPH2+, and aSyn+ neurons was counted in one hemisphere using the optical fractionator StereoInvestigator Program (Microbrightfield Bioscience, Colchester, VT), as previously described (Ares-Santos et al., 2012; Fernández-Pérez et al., 2022). TH+ and TPH2+ cell soma size in the DRN and TH+ in the LC was measured in 3-4 sections per animal (1 field per section) in 6-9 animals per group using Neurolucida v8 Software (MicroBrightField, Williston, VT), as described in Fernández-Pérez et al. (2022).

To quantify aSyn accumulation in DAB-stained sections, we developed a novel method for imaging analysis of optical density to estimate the quantity of aSyn (alpha-synuclein) deposition in neurons and neuropil in the DRN. We initiated the process by converting the color images to black and white (B&W), allowing pixel intensities to range from 0 to 255, where 0 corresponds to black and 255 to white. Next, we computed the histogram of pixel intensities for each section per animal. To subtract the global intensity of the picture, we generated a synthetic image with a Gaussian distribution of pixel intensities, utilizing the same mean intensity as the sample and a variance of 20, derived from the distribution of variances observed in the control samples. Subsequently, we focused on the left tail of the pixel intensity distribution, specifically examining pixel values lower than 160, which correspond to the darker regions in the images. By comparing the histograms of the actual images with the synthetic image, we assessed the difference in optical density in this region. This analysis was then performed for each section of individual animals across all four groups, enabling us to obtain valuable statistics on the quantity of aSyn deposition in neurons and neuropil.

For densitometric analysis of axon terminals, 1 of every 12 serial coronal sections of the BNST and the CeA were selected, using adjacent sections for TH, SERT, DbH, and aSyn staining and 1 of every 4 serial coronal sections of the DRN for densitometric analysis of DbH staining. Images were taken with a Leica microscope using a 5x objective for TH and aSyn quantifications and a 40x objective for SERT and DbH quantification. Images were processed and the proportional stained area was quantified with the ImageJ software (NIH, USA), as described in Ares-Santos et al. (2014) and Fernández-Pérez et al. (2022). Data were represented as the proportional stained area of each structure versus that in control animals.

***Immunofluorescence***

Immunofluorescent staining of TH and aSyn in the BNST, CeA, and DRN, SERT in the BNST and the CeA, and TPH2 in the DRN were performed in 1 of every 12 serial coronal sections, free-floating, as described in Keifman et al. (2019). Antibodies are summarized in Table S1. For histological validation of DLight1.1 sensor expression for fiber photometry, brain coronal sections (30-μm thick) containing BNST and CeA were stained with anti-GFP antibodies. For histological validation of chemogenetic viral transfection, double immunofluorescence against TH and mCherry was done in 1 of every 4 serial coronal sections of DRN, with a total of 4-5 sections per animal. Colocalization studies were manually done with microphotographs taken with a 20x objective on a confocal microscope (Leica Microsystems, Spain) with the ImageJ software (NIH, US).

***Statistical analysis***

Data were analyzed with the statistical software GraphPad Prism 8.0.1 and Matlab (2020b) software. For experiments in which more than two groups were compared, a one-way ANOVA followed by Tukey's post hoc test was used. Differences were considered significant at p-value < 0.05. For the experiments in which two groups were compared, the two-tailed unpaired Student's t-test was used. For fiber photometry experiments, the windows of statistical significance were selected by taking n equal-length intervals around the onset of the behavioral events and testing for each of these intervals with a p-value corrected by n number of interventions from Bonferroni. All intervals with significant differences between groups were highlighted by a shaded area.

**Reference list**

Ares-Santos S, Granado N, Oliva I, O'Shea E, Martin ED, Colado MI, Moratalla R. 2012. Dopamine D(1) receptor deletion strongly reduces neurotoxic effects of methamphetamine. Neurobiol Dis. 45(2):810-20.

Ares-Santos S, Granado N, Espadas I, Martinez-Murillo R, Moratalla R. 2014. Methamphetamine causes degeneration of dopamine cell bodies and terminals of the nigrostriatal pathway evidenced by silver staining. Neuropsychopharmacology. 39(5):1066-80.

Dougalis AG, Matthews G, Bishop M, Brischoux F, Kobayashi K, Ungless M. 2012. Functional properties of dopamine neurons and co-expression of vasoactive intestinal polypeptide in the dorsal raphe nucleus and ventro-lateral periaqueductal grey. Eur J Neurosci. 36:3322-3332.

Espadas I, Darmopil S, Vergaño-Vera E, Ortiz O, Oliva I, Vicario-Abejón C, Martín ED, Moratalla R.2012. L-DOPA-induced increase in TH-immunoreactive striatal neurons in parkinsonian mice: insights into regulation and function. Neurobiol Dis. 48(3):271-81

Espadas I, Ortiz O, García-Sanz P, Sanz-Magro A, Alberquilla S, Solis O, Delgado-García JM, Gruart A, Moratalla R. 2021. Dopamine D2R is Required for Hippocampal-dependent Memory and Plasticity at the CA3-CA1 Synapse. Cereb Cortex31(4):2187-2204.

Fernández-Pérez A, Sanz-Magro A, Moratalla R, Vallejo M. 2022. Restricting feeding to dark phase fails to entrain circadian activity and energy expenditure oscillations in Pitx3-mutant Aphakia mice. Cell Rep. 38(2):110241.

Garcia-Reitböck P, Anichtchik O, Bellucci A, Iovino M, Ballini C, Fineberg E, Ghetti B, Della Corte L, Spano P, Tofaris GK, Goedert M, Spillantini MG.2010. SNARE protein redistribution and synaptic failure in a transgenic mouse model of Parkinson's disease. Brain. 133:2032-44.

Granado N, Ares-Santos S, Oliva I, O'Shea E, Martin ED, Colado MI, Moratalla R. 2011. Dopamine D2-receptor knockout mice are protected against dopaminergic neurotoxicity induced by methamphetamine or MDMA. Neurobiol Dis.;42(3):391-403.

Hajós M, Allers KA, Jennings K, Sharp T, Charette G, Sík A, Kocsis B. 2007. Neurochemical identification of stereotypic burst-firing neurons in the rat dorsal raphe nucleus using juxtacellular labelling methods. Eur J Neurosci. 25(1):119-26.

Keifman E, Ruiz-DeDiego I, Pafundo DE, Paz RM, Solís O, Murer MG, Moratalla R. 2019.Optostimulation of striatonigral terminals in substantia nigra induces dyskinesia that increases after L-DOPA in a mouse model of Parkinson's disease. Br J Pharmacol. 176(13):2146-2161.

Lin R, Liang J, Wang R, Yan T, Zhou Y, Liu Y, Feng Q, Sun F, Li Y, Li A, Gong H, Luo M. 2020. The Raphe Dopamine System Controls the Expression of Incentive Memory. Neuron. 106:498-514.e8.

Lopes G, Bonacchi N, Frazão J, Neto JP, Atallah BV, Soares S, Moreira L, Matias S, Itskov PM, Correia PA, Medina RE, Calcaterra L, Dreosti E, Paton JJ, Kampff AR. .2015. Bonsai: an event-based framework for processing and controlling data streams. Front Neuroinform.8;9:7.

Martianova E, Aronson S, Proulx CD. 2019. Multi-Fiber Photometry to Record Neural Activity in Freely-Moving Animals. J Vis Exp. 20;(152).

Owens-French J, Li SB, Francois M, Leigh Townsend R, Daniel M, Soulier H, Turner A, de Lecea L, Münzberg H, Morrison C, Qualls-Creekmore E. 2022. Lateral hypothalamic galanin neurons are activated by stress and blunt anxiety-like behavior in mice. Behav Brain Res.423:113773.

Park J, Wheeler RA, Fontillas K, Keithley RB, Carelli RM, Wightman RM. 2012. Catecholamines in the bed nucleus of the stria terminalis reciprocally respond to reward and aversion. Biol Psychiatry. 71(4):327-34.

Rein B, Ma K, Yan Z. 2020. A standardized social preference protocol for measuring social deficits in mouse models of autism. Nat Protoc 15(10):3464-3477.

Suarez LM, Solis O, Sanz-Magro A, Alberquilla S, Moratalla R. 2020. Dopamine D1 Receptors Regulate Spines in Striatal Direct-Pathway and Indirect-Pathway Neurons. Mov Disord. 35(10):1810-1821.

Tofaris GK, Garcia Reitböck P, Humby T, Lambourne SL, O'Connell M, Ghetti B, Gossage H, Emson PC, Wilkinson LS, Goedert M, Spillantini MG. 2006. Pathological changes in dopaminergic nerve cells of the substantia nigra and olfactory bulb in mice transgenic for truncated human alpha-synuclein (1-120): implications for Lewy body disorders. J Neurosci. 26:3942-50.

Vegas-Suárez S, Aristieta A, Requejo C, Bengoetxea H, Lafuente JV, Miguelez C, Ugedo L. 2021. The effect of 5-HT1A receptor agonists on the entopeduncular nucleus is modified in 6-hydroxydopamine-lesioned rats. Br J Pharmacol. 178(12):2516-2532.

Zhou L, Liu D, Xie Z, Deng D, Shi G, Zhao J, Bai S, Yang L, Zhang R, Shi Y. 2022. Electrophysiological Characteristics of Dorsal Raphe Nucleus in Tail Suspension Test. Front Behav Neurosci. 16:893465.
